# Supplementary material
Source: MDPI journal article supplement (https://www.mdpi.com/1999-4907/14/2/429)
Supplement: s1 [file s1]

Table S1 Coefficient of variable in PCA

| Variables   | PC1    | PC2    |
|-------------|--------|--------|
| pn          | 0.907  | -0.302 |
| GS          | 0.967  | -0.006 |
| Tr          | 0.702  | -0.456 |
| Ci          | 0.500  | 0.059  |
| Fv/Fm       | 0.963  | -0.065 |
| $\Phi$ PSII | 0.923  | -0.118 |
| qp          | 0.921  | 0.046  |
| ETR         | 0.931  | 0.036  |
| SOD         | 0.782  | 0.309  |
| POD         | 0.681  | 0.548  |
| MDA         | -0.900 | -0.288 |
| Pro         | -0.291 | 0.718  |
